# Supplementary material for: Mechanosensitive Ion Channel TMEM63A Gangs Up with Local Macrophages to Modulate Chronic Post-amputation Pain
Source: PubMed Central journal article supplement (PMC9905372; doi:10.1007/s12264-022-00910-0), 2022-07-12
Supplement: 12264_2022_910_MOESM1_ESM.pdf [file 12264_2022_910_MOESM1_ESM.pdf]

## Supplementary Materials

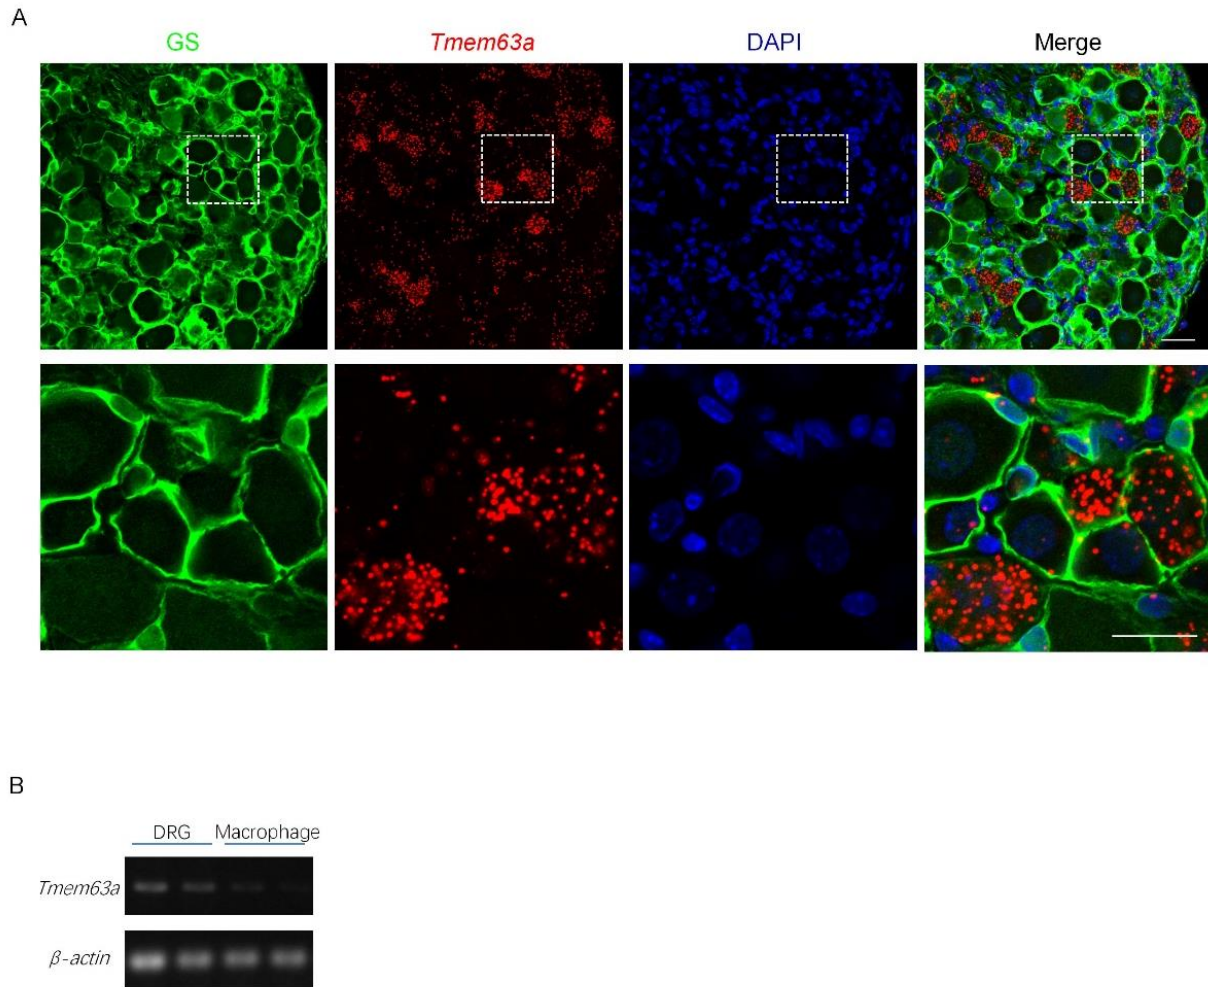

**Fig. S1** The expression of TMEM63A in satellite glial cells and macrophages. **A** Representative images of ISH combined with IHC staining for the SGC marker GS (green) showing the expression of *Tmem63a* (red) in SGCs. The lower panels are partial enlargements of the boxed areas in the upper panels. Scale bars, 50  $\mu$ m (upper) and 25  $\mu$ m (lower). **B** RT-PCR images showing the expression of *Tmem63a* in FACS-purified peritoneal macrophages with CD68.

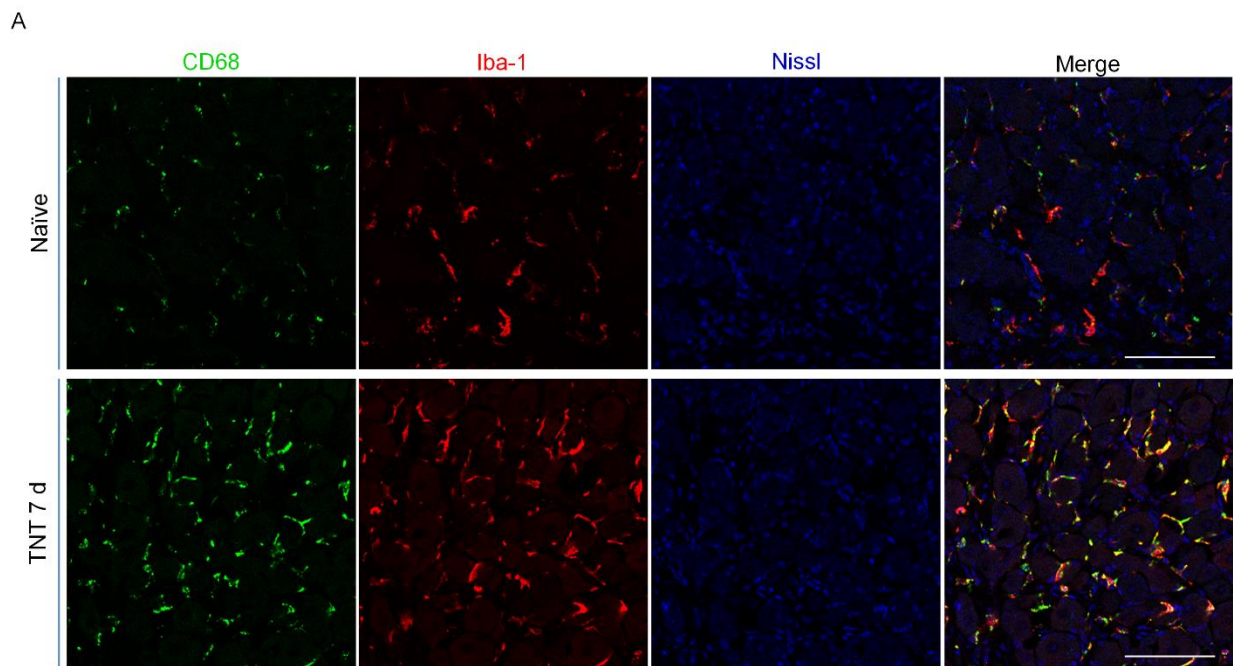

**Fig. S2** Macrophage infiltration in the DRG of a naïve mouse and a TNT mouse. Double immunostaining with macrophage markers CD68 and Iba1 in the DRG from a naïve mouse and a day 7 TNT mouse (scale bars, 100  $\mu$ m).

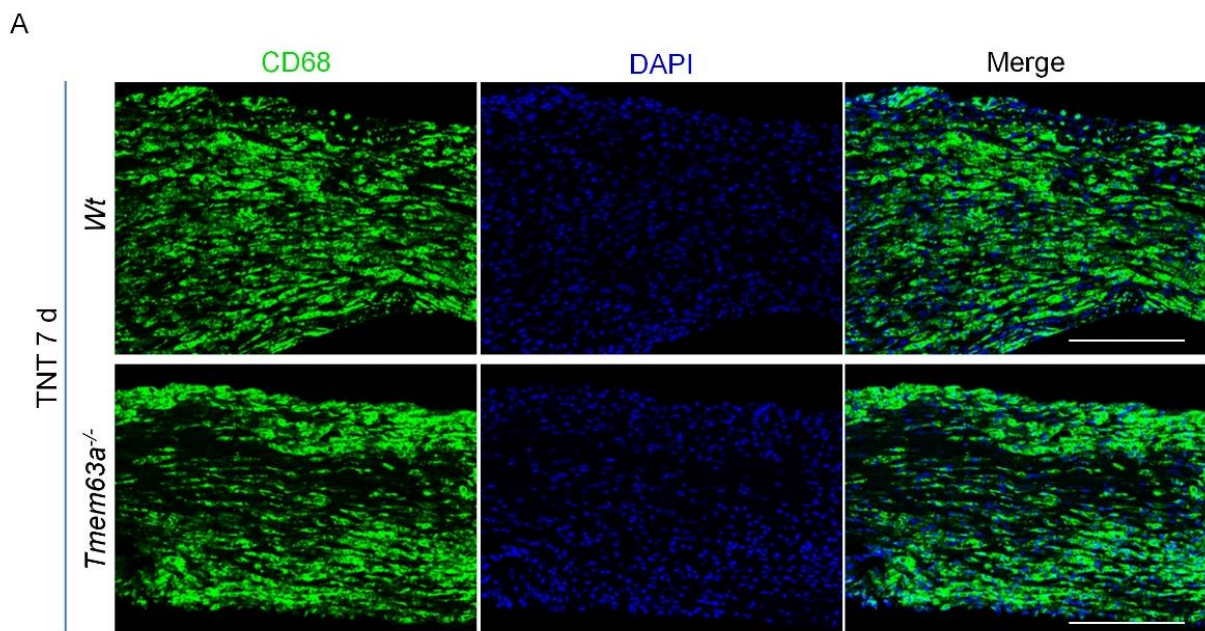

**Fig. 3** Macrophage infiltration in the residual tibial stump of a WT and a *Tmem63a*<sup>-/-</sup> mouse.

Immunostaining of CD68 in the residual nerve stump of WT and *Tmem63a*<sup>-/-</sup> mice on day 7 after TNT surgery (scale bars, 100  $\mu$ m).

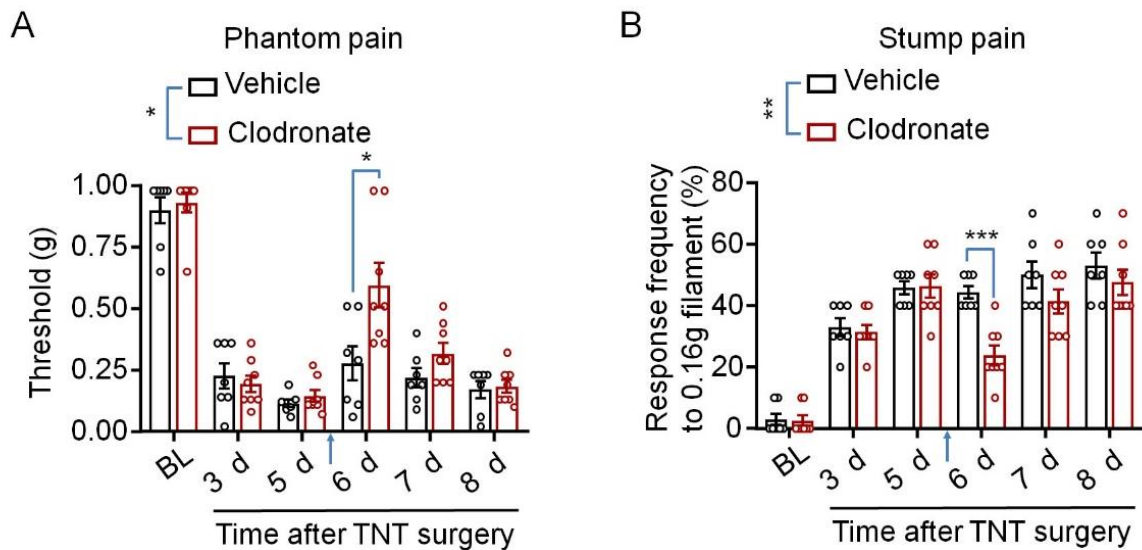

**Fig. 4** The pain behaviors 24 h after macrophage ablation on day 5 after TNT. **A, B** Phantom pain (**A**) and stump pain (**B**) 24 h after intrathecal injection of clodronate liposomes on day 5 after TNT (blue arrows, time of intrathecal injection;  $n = 7-8$ ; \* $P < 0.05$ , \*\* $P < 0.01$ , \*\*\* $P < 0.001$ , two-way ANOVA).

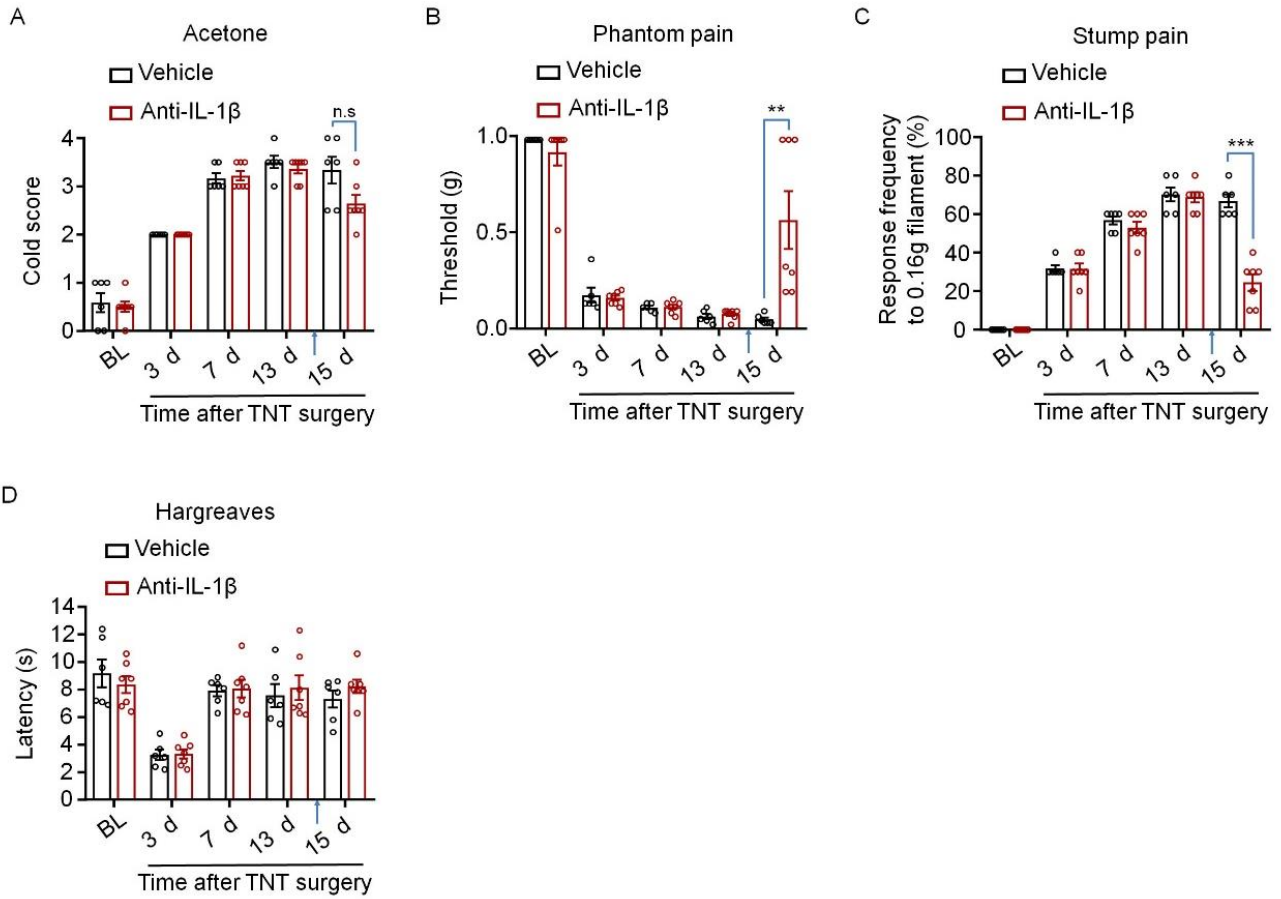

**Fig. 5** The effect of IL-1 $\beta$  neutralizing antibody on cold allodynia (A), phantom pain (B), stump pain (C), and heat hyperalgesia (D) in the TNT mouse model. Mice were given control antibody or IL-1 $\beta$  neutralizing antibody (500 ng/ $\mu$ L, 10  $\mu$ L in saline) 15 days after TNT surgery. Blue arrows, time of intrathecal injection;  $n = 6-7$ ; \*\* $P < 0.01$ , \*\*\* $P < 0.001$ , two-way ANOVA.
